# Supplementary material for: ICG-001, an Inhibitor of the β-Catenin and cAMP Response Element-Binding Protein Dependent Gene Transcription, Decreases Proliferation but Enhances Migration of Osteosarcoma Cells
Source: MDPI journal article supplement (doi:10.3390/ph14050421), 2021-05-01
Supplement: s1 [file s1]

## Supplementary figures

(a)

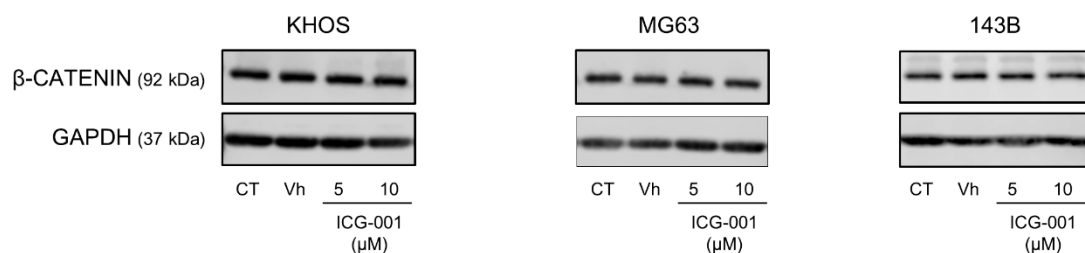

(b)

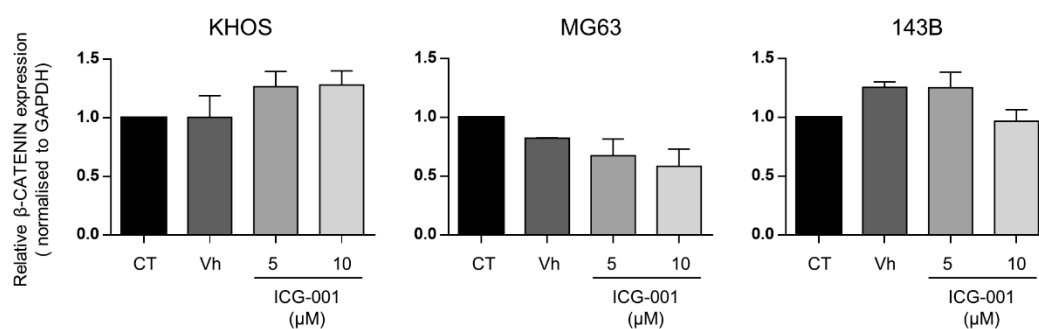

**Supplementary figure S1:** ICG-001 does not decrease β-CATENIN protein level in KHOS, MG63 and 143B osteosarcoma cells. (a) β-CATENIN protein level evaluated by Western Blot in osteosarcoma cell lines treated with Vehicle (Vh) or ICG-001 (5-10μM) during 24 hours (one representative experiment of two independent experiments). (b) Relative β-catenin protein quantification, normalised with GAPDH protein expression. Bars indicate means ±SD of two independent experiments.

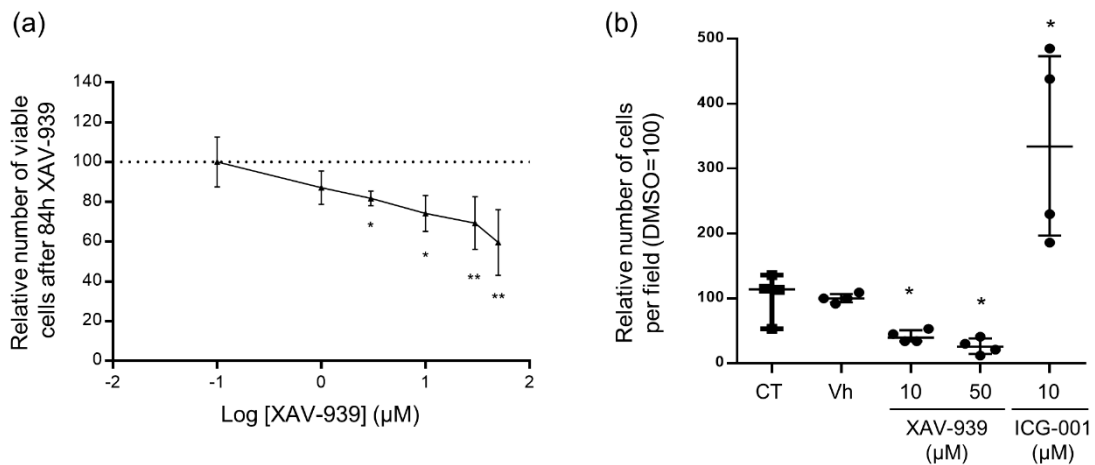

**Supplementary figure S2:** XAV-939 decreases viability and migration of KHOS osteosarcoma cells. (a) Relative number of viable cells analysed in cells treated with XAV-939 or vehicle (Vh) from 1 to 50  $\mu\text{M}$  for 48 hours. At the end points, cells were stained with crystal violet and the curves represent the means  $\pm$ SD relativized with the value of the vehicle (DMSO), of 3 independent experiments, each performed in triplicate. The dashed line represents the vehicle value set to 100. \*,  $p < 0.05$ ; \*\*,  $p < 0.01$  vs vehicle. (b) Migrated KHOS cells counting after 24h of XAV-939 (10  $\mu\text{M}$  or 50  $\mu\text{M}$ ), ICG-001 (10  $\mu\text{M}$ ) or vehicle (Vh) pre-treatment and seeding in Boyden Chamber for 8h. Bars represent means  $\pm$ SD (N=3, each performed in duplicate). \*,  $p < 0.05$  vs vehicle.
